# Supplementary material for: Optical and chemical properties of As–Se and As–S–Se solution processed thin films prepared via As50Se50 source solution modification
Source: Royal Society of Chemistry journal article supplement (doi:10.1039/d3ma00614j), 2024-01-01
Supplement: d3ma00614j1.pdf [file d3ma00614j1.pdf]

## Optical and chemical properties of As-Se and As-S-Se solution processed thin films, prepared via $As_{50}Se_{50}$ source solution modification – supporting information

Jiri Jemelka<sup>a</sup>, Michal Kurka<sup>b</sup>, Stanislav Slang<sup>b</sup>, Jiri Jancalek<sup>b</sup>, Karel Palka<sup>a,b\*</sup>, Miroslav Vlcek<sup>a,b</sup>

<sup>a</sup> Department of General and Inorganic Chemistry, Faculty of Chemical Technology, University of Pardubice, Studentska 95, 53210 Pardubice, Czech Republic

<sup>b</sup> Center of Materials and Nanotechnologies, Faculty of Chemical Technology, University of Pardubice, Studentska 95, 53210 Pardubice, Czech Republic

[\\*karel.palka@upce.cz](mailto:karel.palka@upce.cz)

**Figure 1S.** Raman spectra of all prepared thin film compositions at all annealing temperatures.

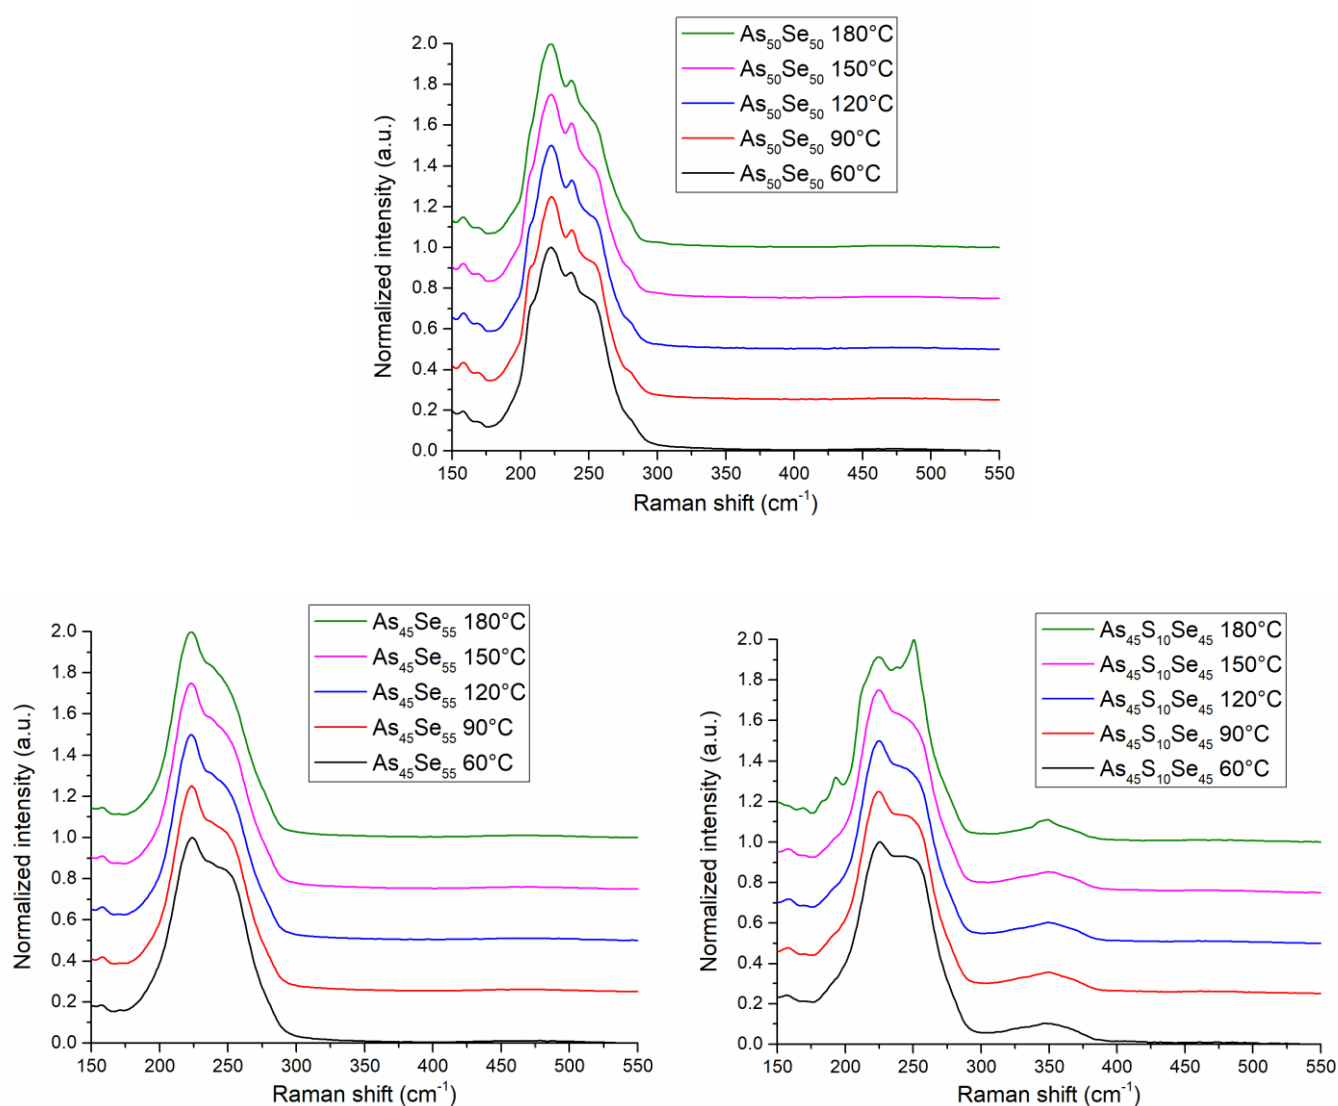

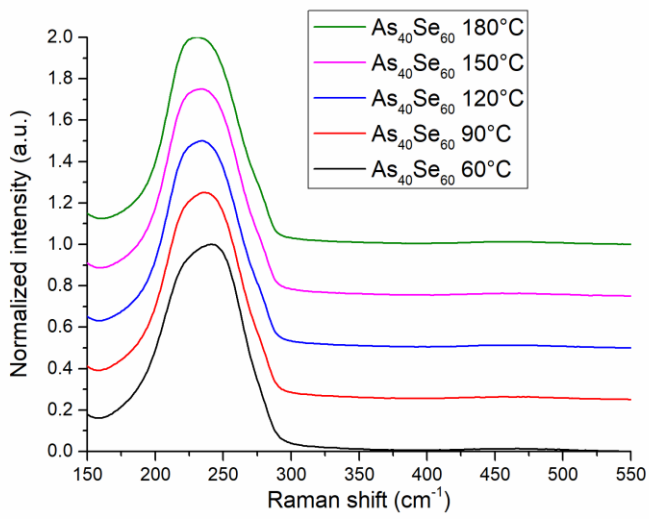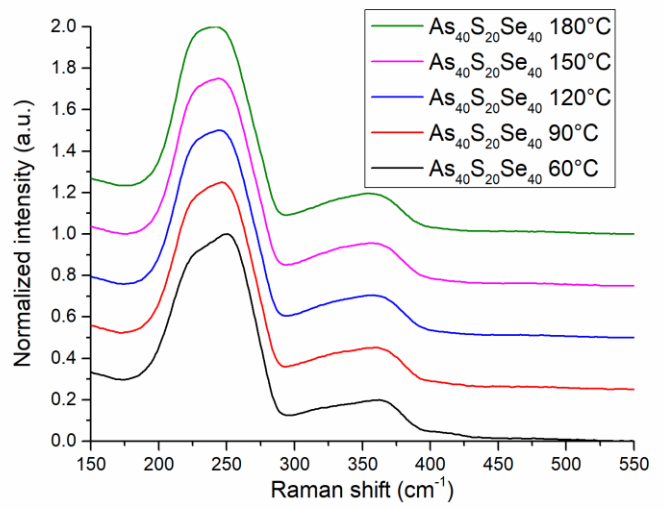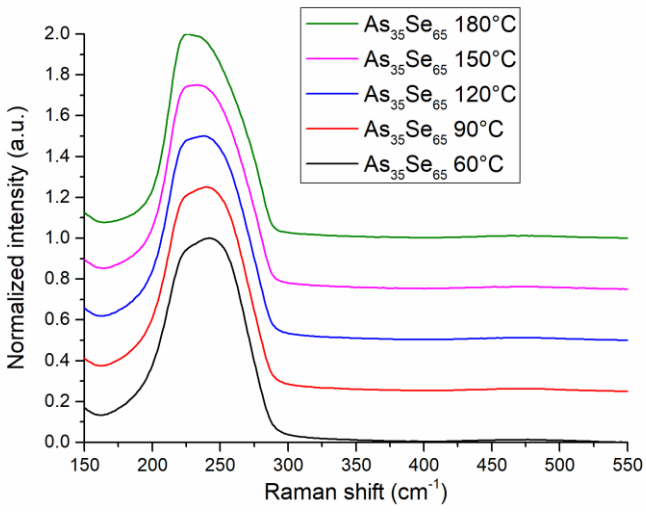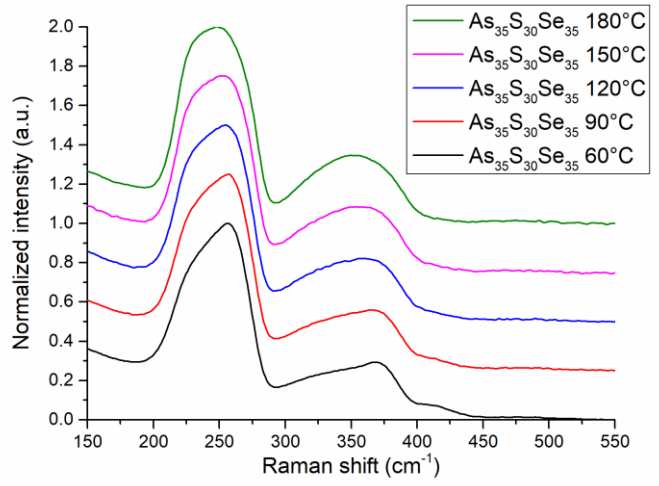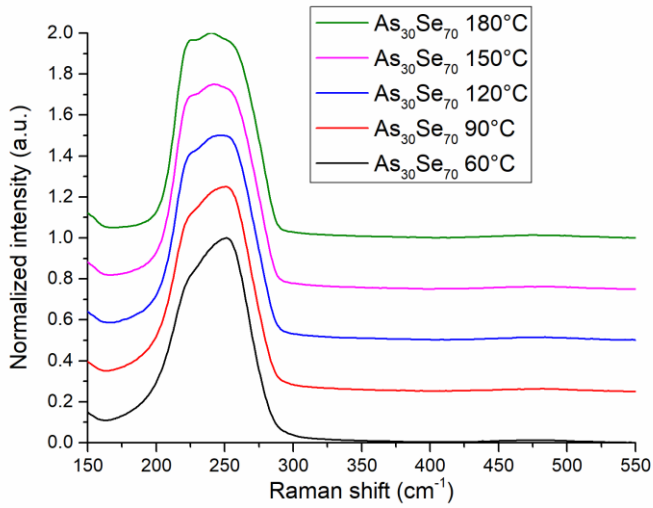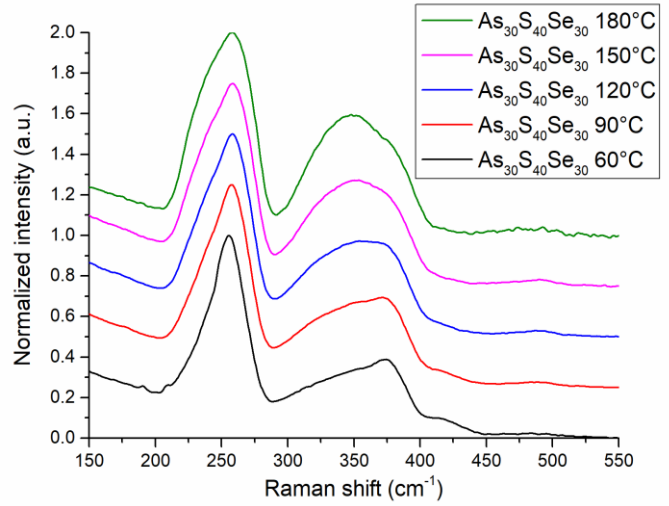

**Table 1S.** Composition of prepared thin films at all annealing temperatures.

| T [°C]                                | As [at. %] | Se [at. %] |
|---------------------------------------|------------|------------|
| <b>As<sub>50</sub>Se<sub>50</sub></b> |            |            |
| 60                                    | 48.4 ± 0.1 | 51.6 ± 0.1 |
| 90                                    | 48.4 ± 0.2 | 51.6 ± 0.2 |
| 120                                   | 48.5 ± 0.1 | 51.5 ± 0.1 |
| 150                                   | 48.3 ± 0.1 | 51.7 ± 0.1 |
| 180                                   | 47.8 ± 0.2 | 52.2 ± 0.2 |
| <b>As<sub>45</sub>Se<sub>55</sub></b> |            |            |
| 60                                    | 43.3 ± 0.1 | 56.7 ± 0.1 |
| 90                                    | 43.3 ± 0.1 | 56.7 ± 0.1 |
| 120                                   | 43.3 ± 0.1 | 56.7 ± 0.1 |
| 150                                   | 43.2 ± 0.2 | 56.8 ± 0.2 |
| 180                                   | 42.8 ± 0.2 | 57.2 ± 0.2 |
| <b>As<sub>40</sub>Se<sub>60</sub></b> |            |            |
| 60                                    | 38.8 ± 0.2 | 61.2 ± 0.2 |
| 90                                    | 38.6 ± 0.2 | 61.4 ± 0.2 |
| 120                                   | 38.5 ± 0.2 | 61.5 ± 0.2 |
| 150                                   | 38.4 ± 0.1 | 61.6 ± 0.1 |
| 180                                   | 38.9 ± 0.2 | 61.1 ± 0.2 |
| <b>As<sub>35</sub>Se<sub>65</sub></b> |            |            |
| 60                                    | 33.8 ± 0.1 | 66.2 ± 0.1 |
| 90                                    | 34.1 ± 0.2 | 65.9 ± 0.2 |
| 120                                   | 33.8 ± 0.1 | 66.2 ± 0.1 |
| 150                                   | 33.9 ± 0.1 | 66.1 ± 0.1 |
| 180                                   | 34.2 ± 0.3 | 65.8 ± 0.3 |
| <b>As<sub>30</sub>Se<sub>70</sub></b> |            |            |
| 60                                    | 29.0 ± 0.1 | 71.0 ± 0.1 |
| 90                                    | 28.9 ± 0.1 | 71.1 ± 0.1 |
| 120                                   | 28.9 ± 0.1 | 71.1 ± 0.1 |
| 150                                   | 29.0 ± 0.2 | 71.0 ± 0.2 |
| 180                                   | 29.4 ± 0.2 | 70.6 ± 0.2 |

  

| T                                                   | As [at. %] | S [at. %]  | Se [at. %] |
|-----------------------------------------------------|------------|------------|------------|
| <b>As<sub>45</sub>S<sub>10</sub>Se<sub>45</sub></b> |            |            |            |
| 60                                                  | 43.0 ± 0.2 | 10.9 ± 0.2 | 46.1 ± 0.1 |
| 90                                                  | 42.9 ± 0.1 | 11.0 ± 0.3 | 46.1 ± 0.3 |
| 120                                                 | 43.3 ± 0.2 | 10.5 ± 0.2 | 46.2 ± 0.1 |
| 150                                                 | 43.0 ± 0.2 | 10.0 ± 0.2 | 47.0 ± 0.1 |
| 180                                                 | 42.6 ± 0.4 | 8.2 ± 0.3  | 49.2 ± 0.2 |
| <b>As<sub>40</sub>S<sub>20</sub>Se<sub>40</sub></b> |            |            |            |
| 60                                                  | 38.1 ± 0.3 | 21.9 ± 0.4 | 40.0 ± 0.3 |
| 90                                                  | 38.2 ± 0.3 | 21.6 ± 0.4 | 40.2 ± 0.2 |
| 120                                                 | 37.9 ± 0.3 | 22.3 ± 0.4 | 39.8 ± 0.2 |
| 150                                                 | 37.6 ± 0.2 | 22.6 ± 0.5 | 39.8 ± 0.3 |
| 180                                                 | 38.2 ± 0.2 | 19.6 ± 0.3 | 42.2 ± 0.2 |
| <b>As<sub>35</sub>S<sub>30</sub>Se<sub>35</sub></b> |            |            |            |
| 60                                                  | 33.2 ± 0.1 | 32.1 ± 0.2 | 34.7 ± 0.1 |
| 90                                                  | 33.3 ± 0.3 | 31.8 ± 0.4 | 34.8 ± 0.3 |
| 120                                                 | 33.4 ± 0.2 | 31.6 ± 0.3 | 35.1 ± 0.1 |
| 150                                                 | 33.4 ± 0.2 | 30.4 ± 0.4 | 36.2 ± 0.2 |
| 180                                                 | 34.1 ± 0.1 | 28.3 ± 0.2 | 37.6 ± 0.2 |
| <b>As<sub>30</sub>S<sub>40</sub>Se<sub>30</sub></b> |            |            |            |
| 60                                                  | 28.7 ± 0.3 | 42.4 ± 0.6 | 28.8 ± 0.4 |
| 90                                                  | 28.8 ± 0.1 | 42.2 ± 0.2 | 29.0 ± 0.2 |
| 120                                                 | 28.9 ± 0.2 | 41.2 ± 0.5 | 29.9 ± 0.3 |
| 150                                                 | 28.5 ± 0.2 | 38.4 ± 0.3 | 33.1 ± 0.2 |
| 180                                                 | 29.5 ± 0.2 | 38.9 ± 0.2 | 31.6 ± 0.1 |

Figure 2S. UV-VIS-NIR spectra of as-prepared thin films and thin films annealed at 150°C.

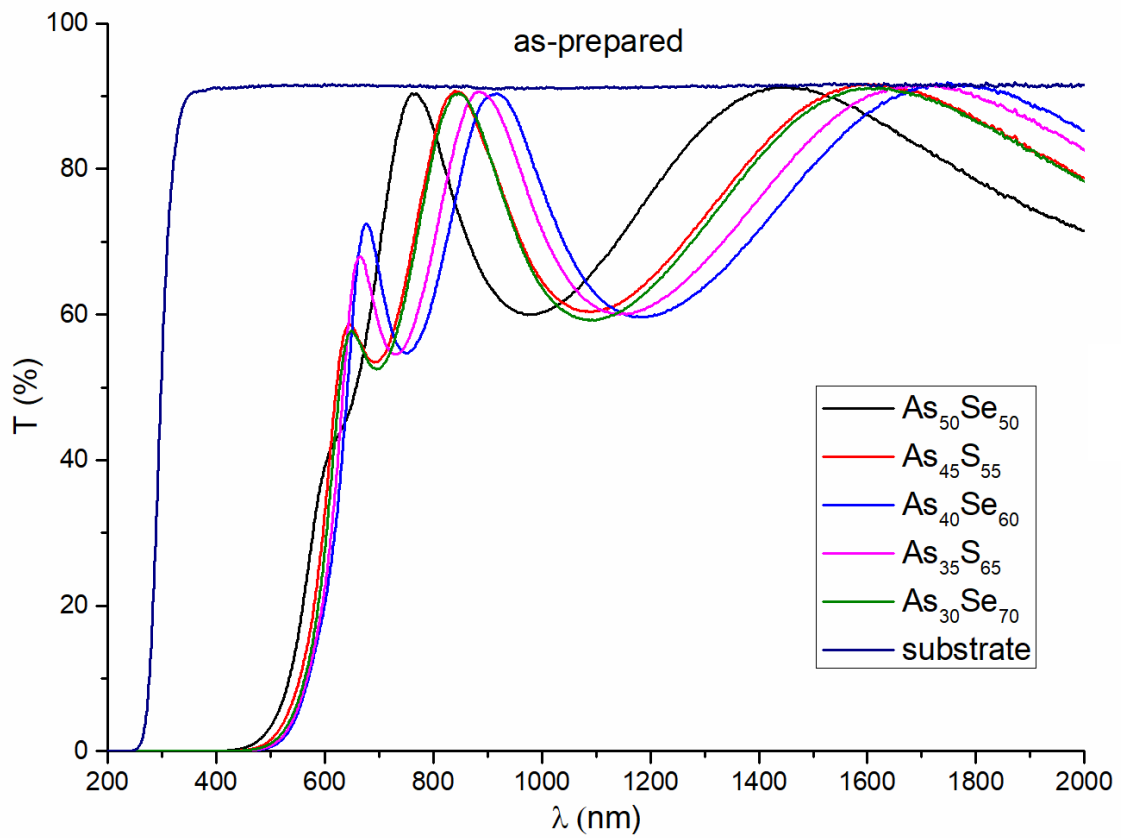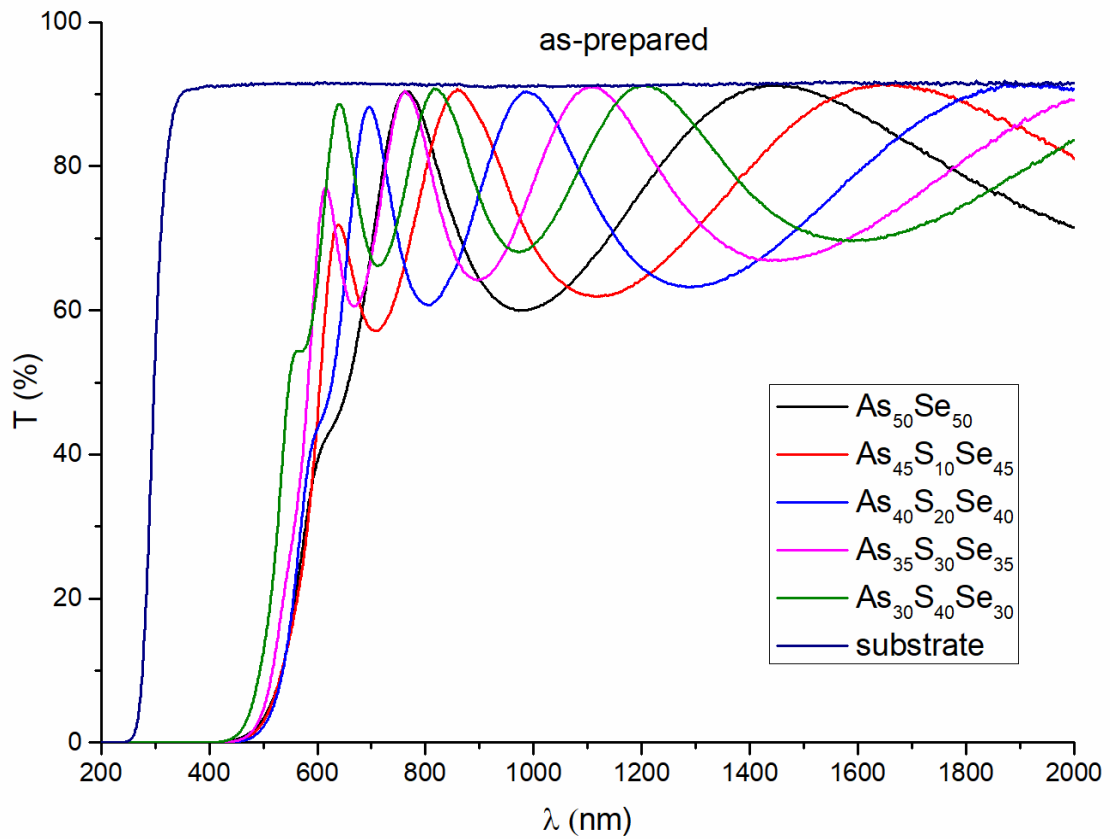

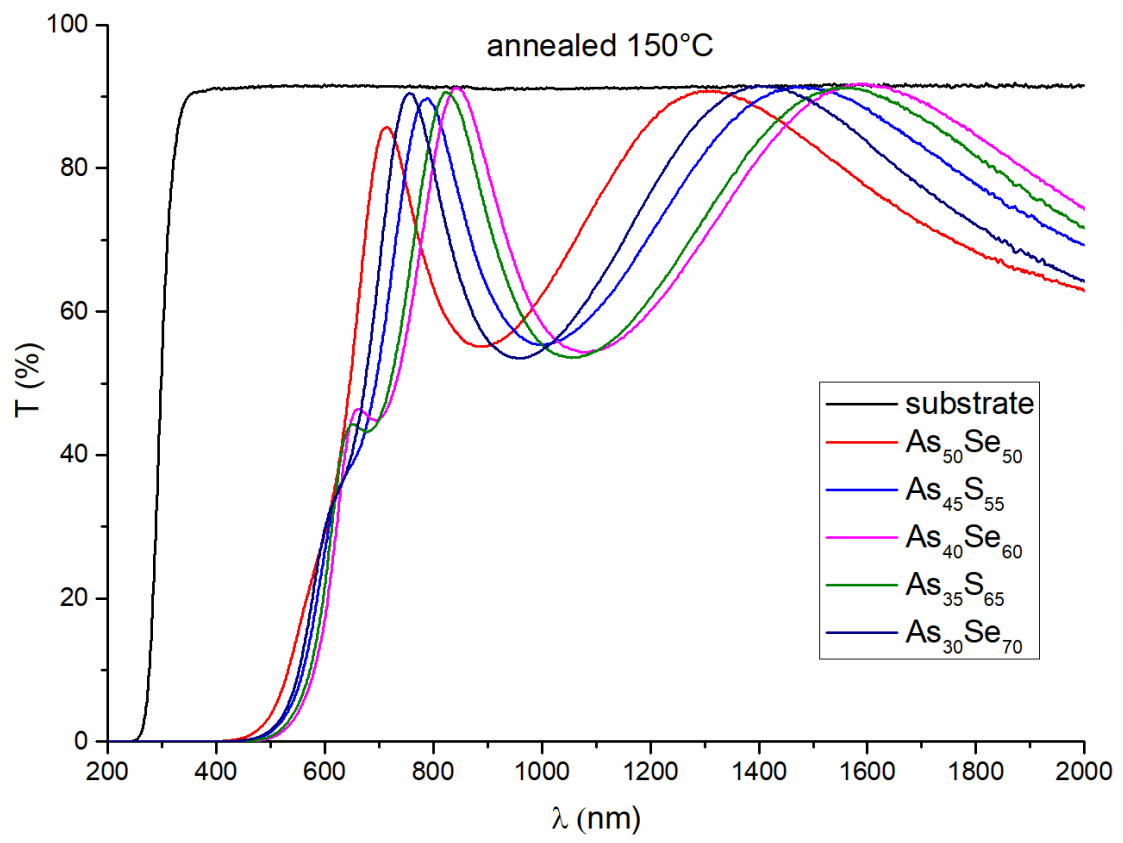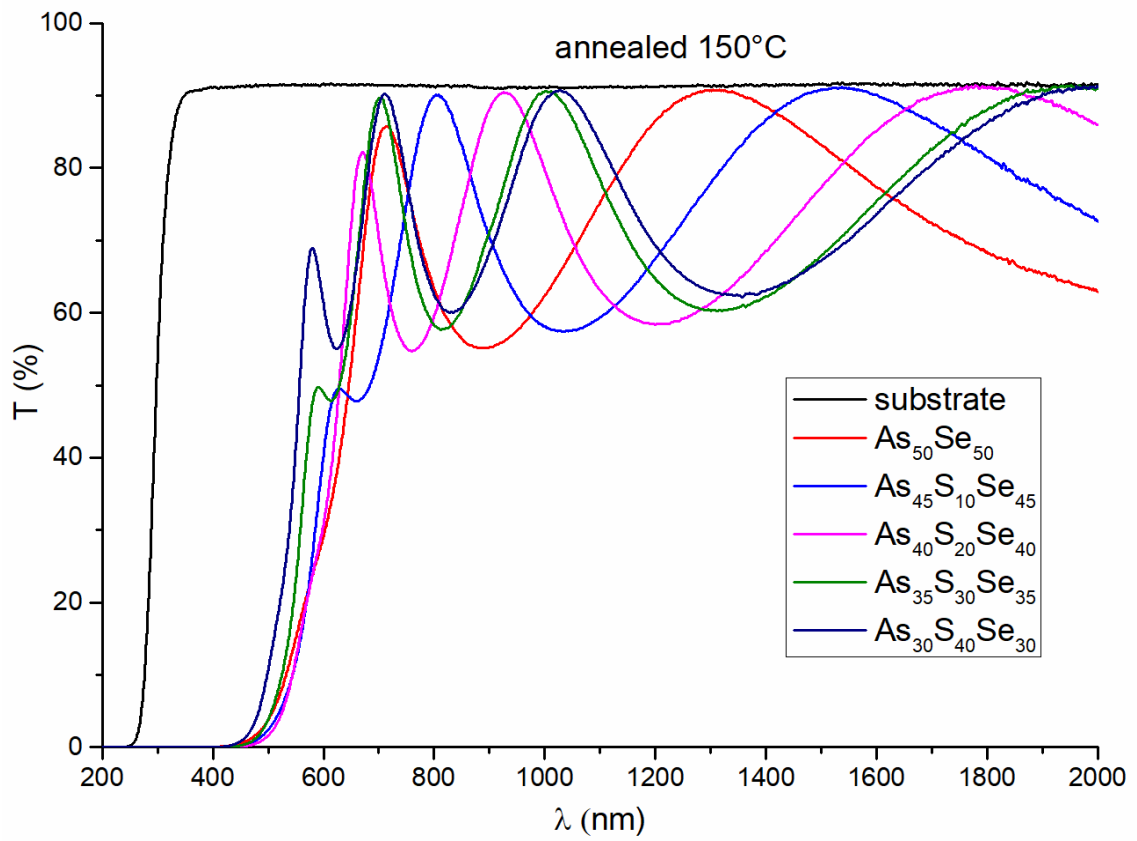

**Figure 3S.** SEM scans of all studied thin film compositions at all annealing temperatures – Scan view field 200  $\mu\text{m}$ , accelerating voltage 10 kV.

$\text{As}_{30}\text{Se}_{70}$

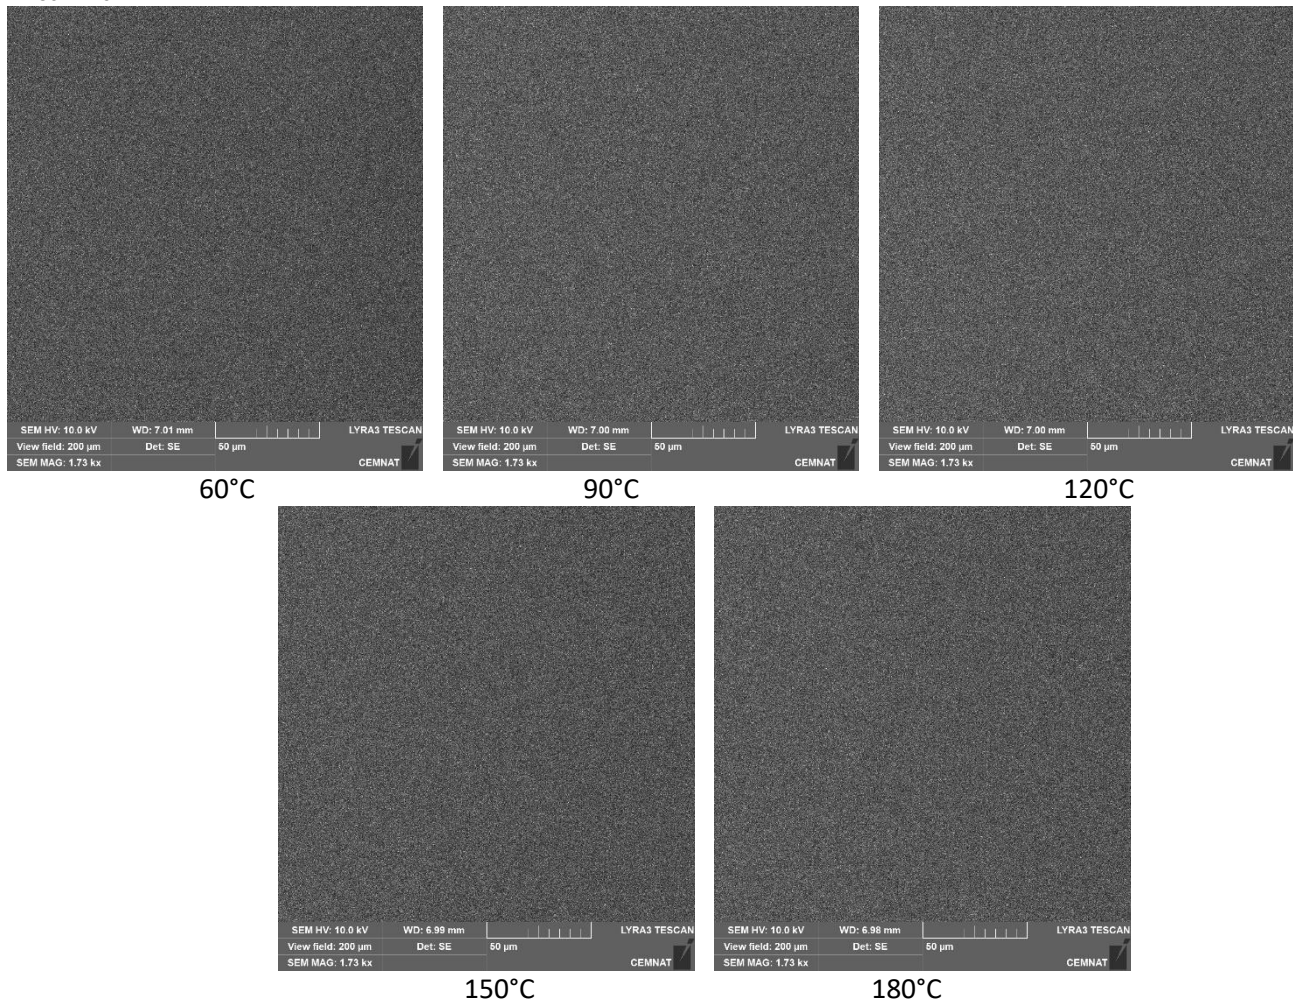

$\text{As}_{35}\text{Se}_{65}$

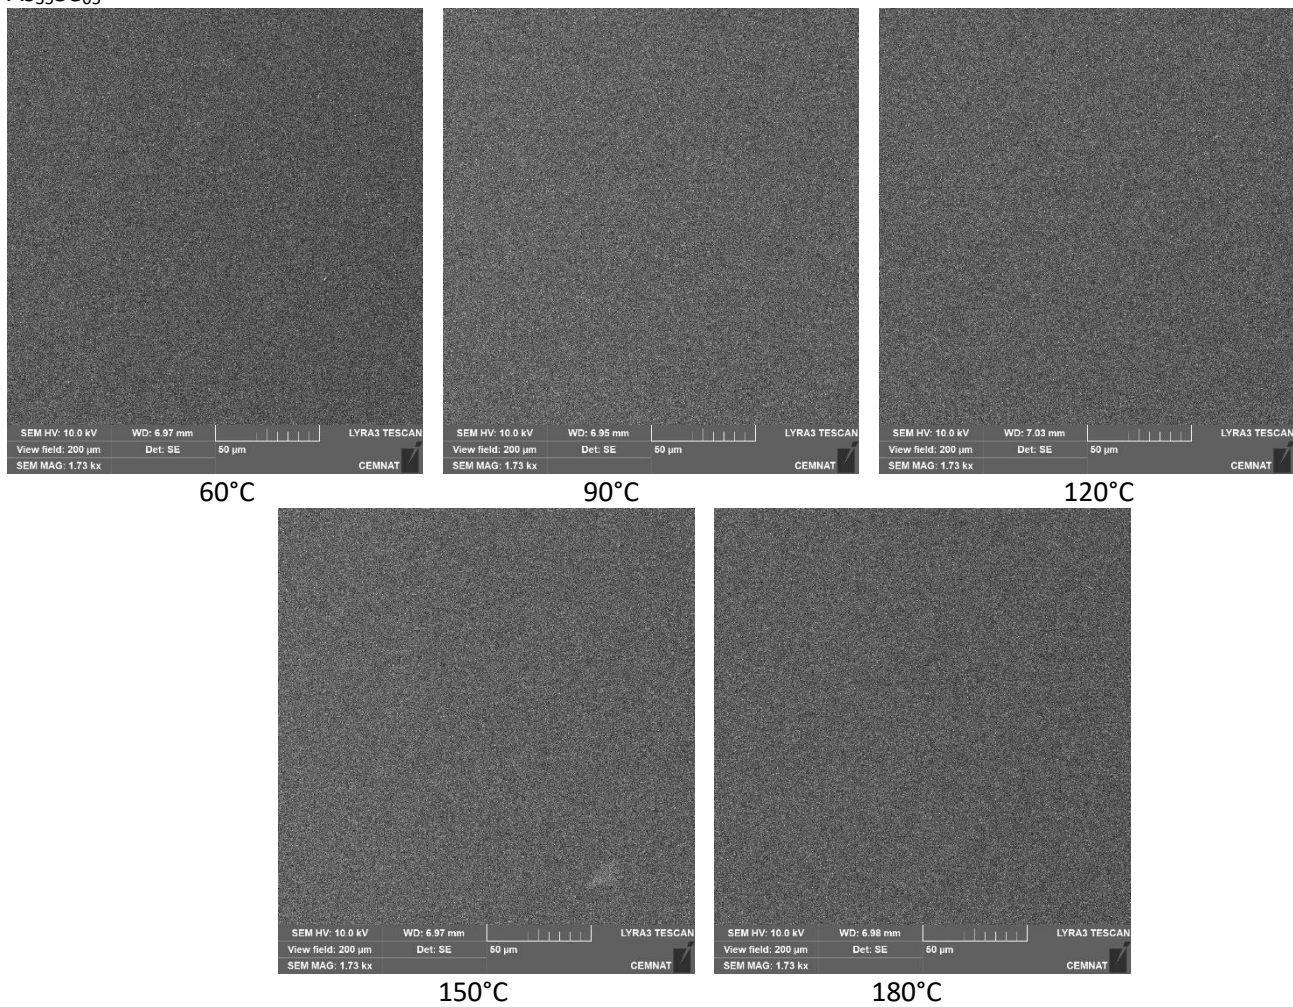



As<sub>40</sub>Se<sub>60</sub>

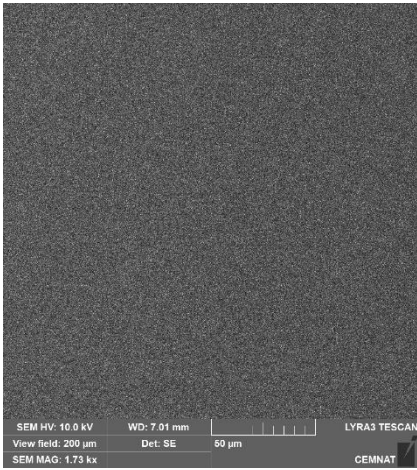

60°C

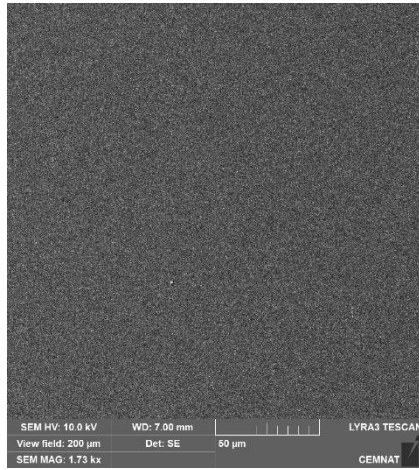

90°C

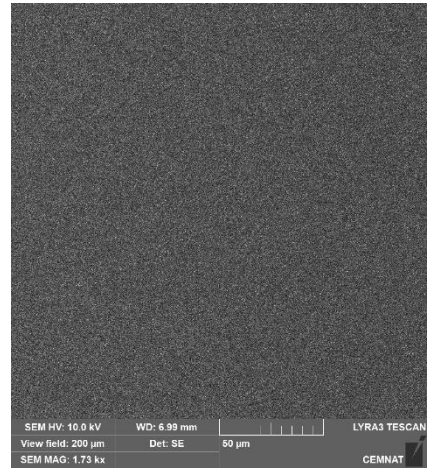

120°C

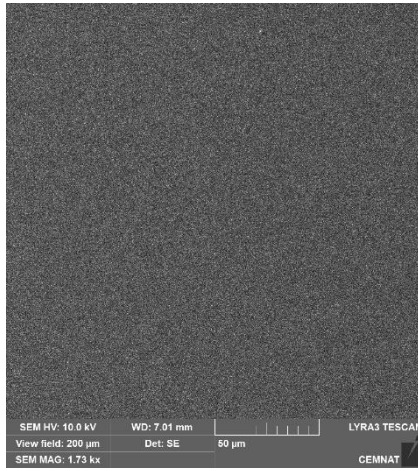

150°C

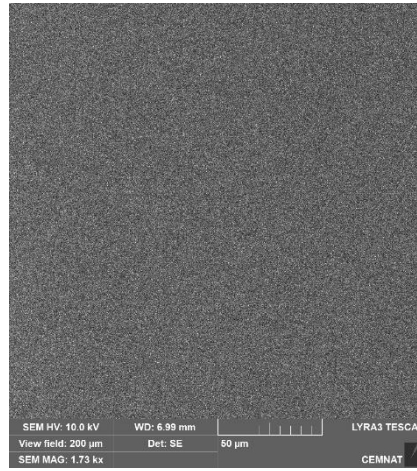

180°C

As<sub>45</sub>Se<sub>55</sub>

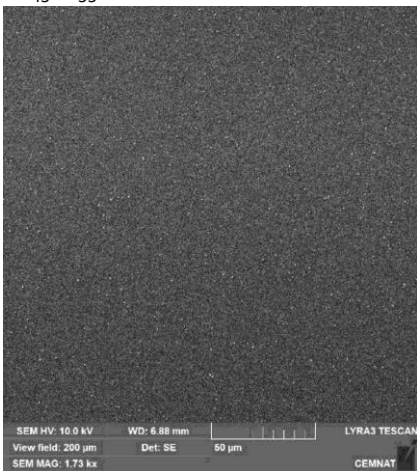

60°C

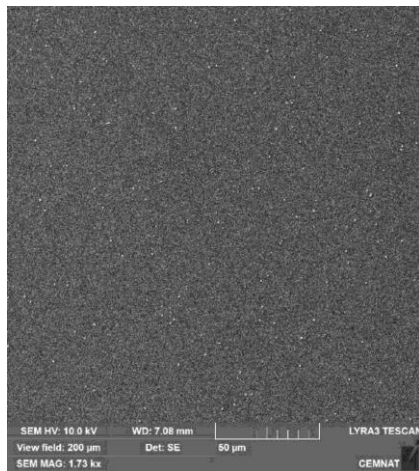

90°C

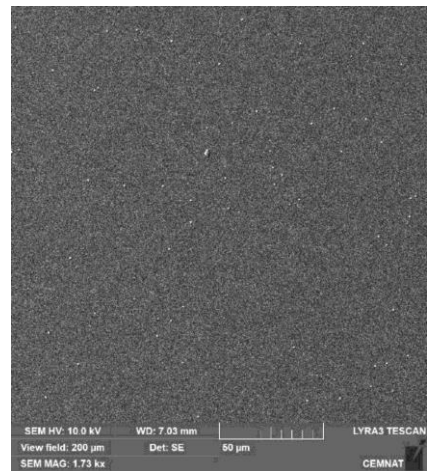

120°C

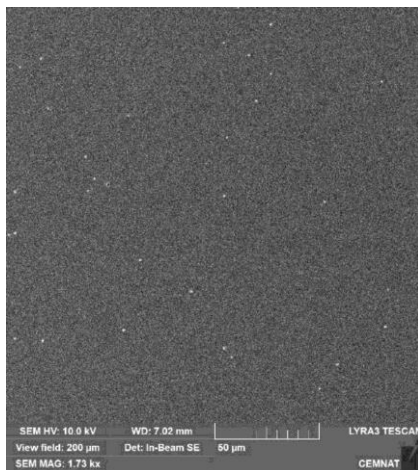

150°C

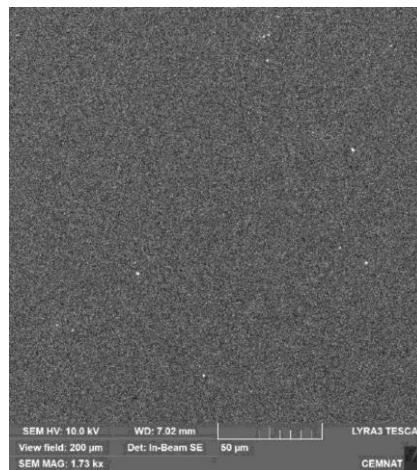

180°C

As<sub>50</sub>Se<sub>50</sub>

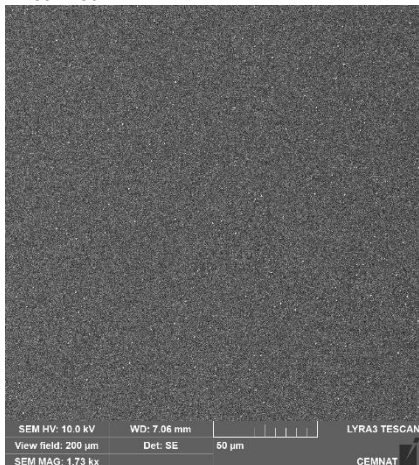

60°C

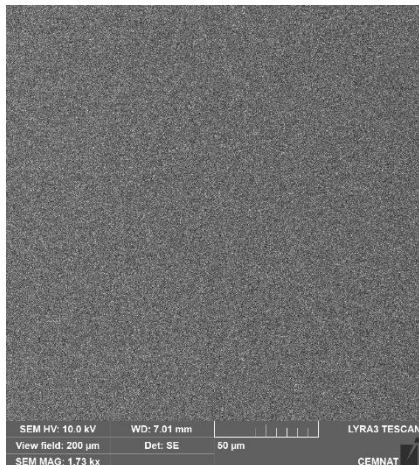

90°C

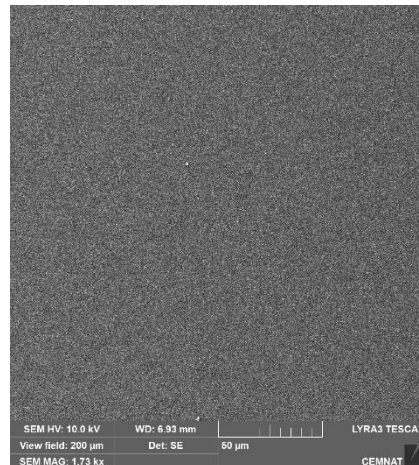

120°C

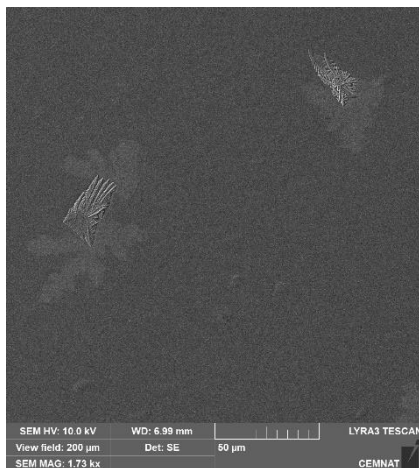

150°C

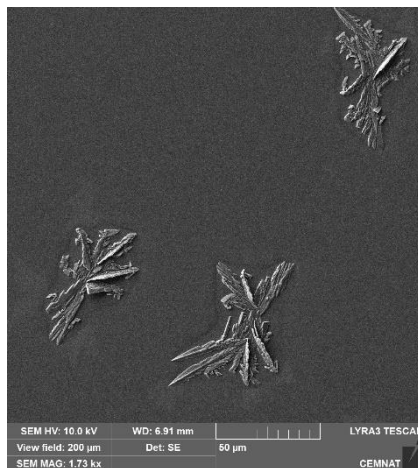

180°C

As<sub>45</sub>S<sub>10</sub>Se<sub>45</sub>

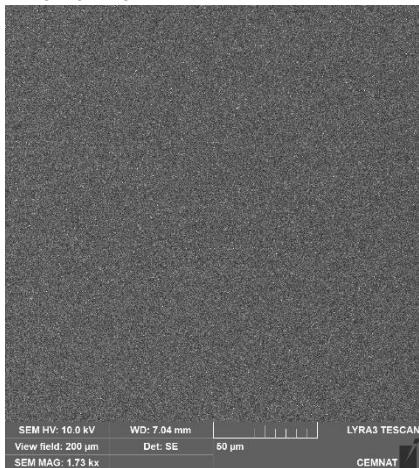

60°C

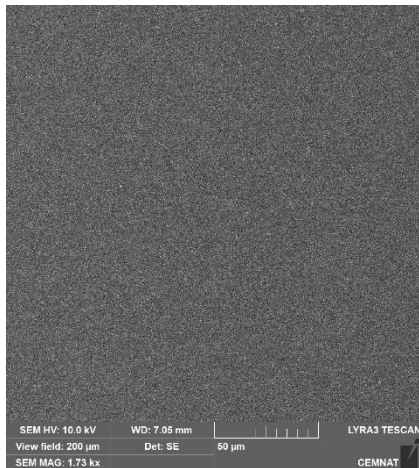

90°C

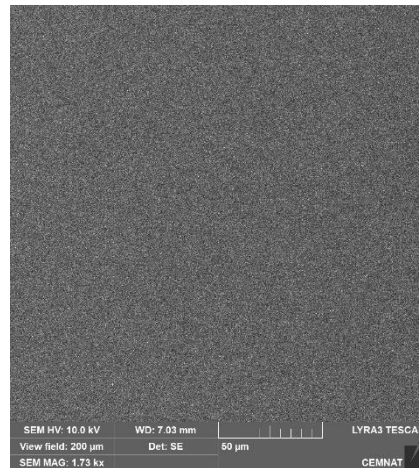

120°C

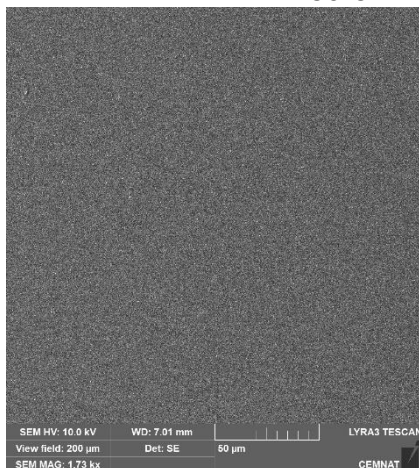

150°C

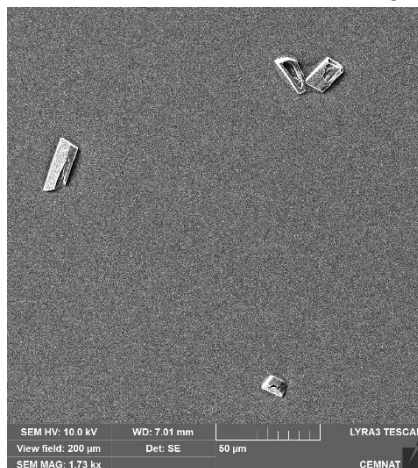

180°C



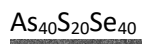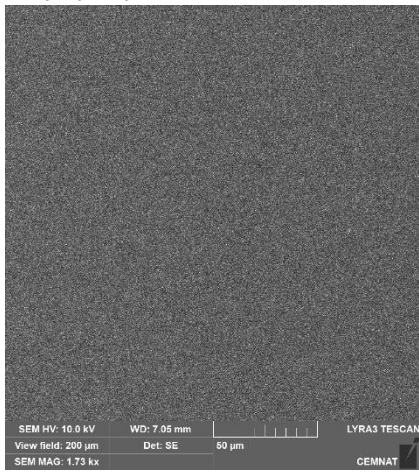

60°C

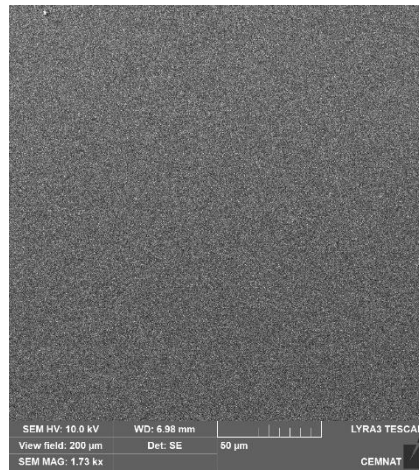

90°C

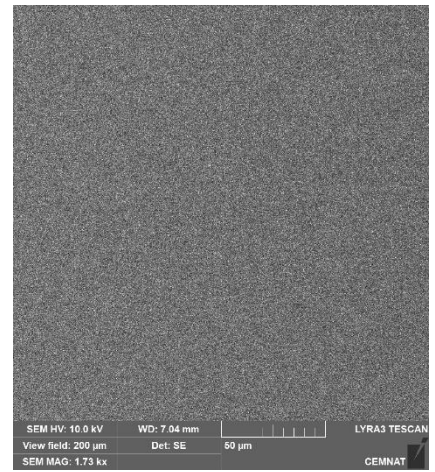

120°C

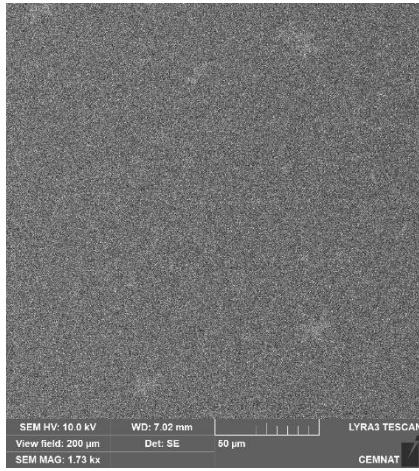

150°C

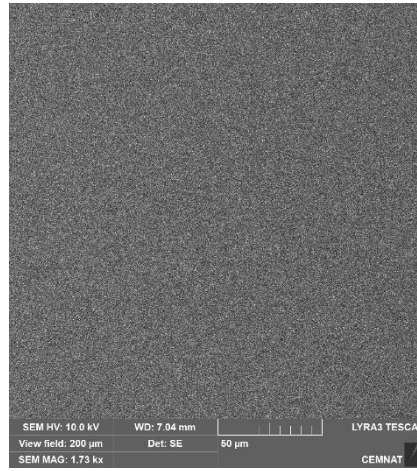

180°C

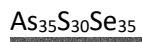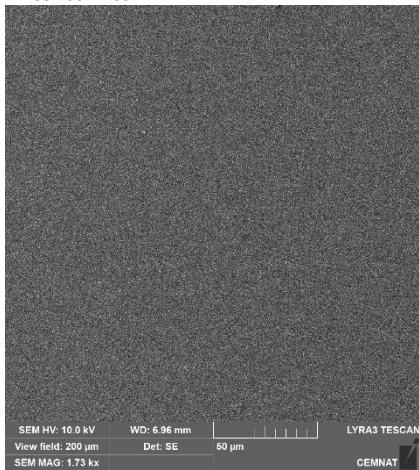

60°C

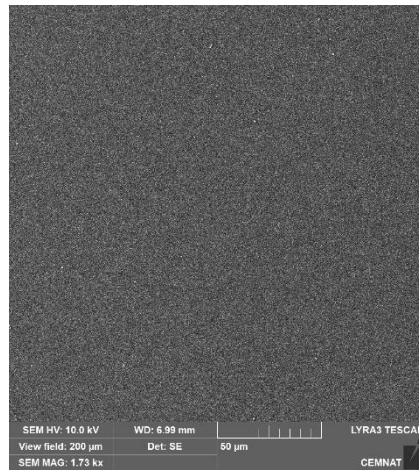

90°C

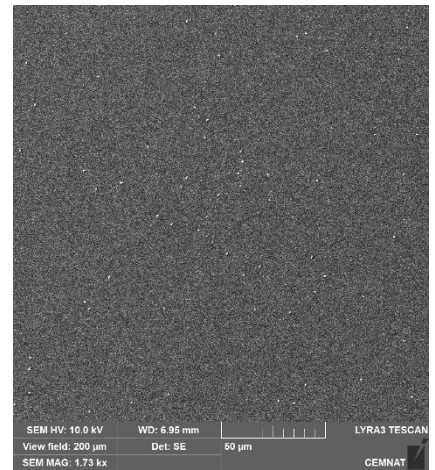

120°C

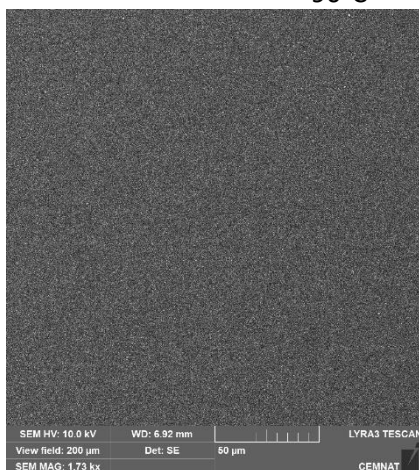

150°C

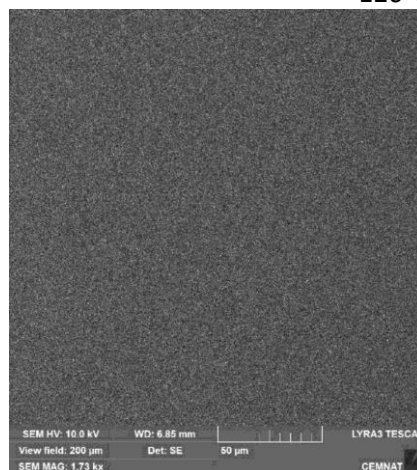

180°C

As<sub>30</sub>S<sub>40</sub>Se<sub>30</sub>

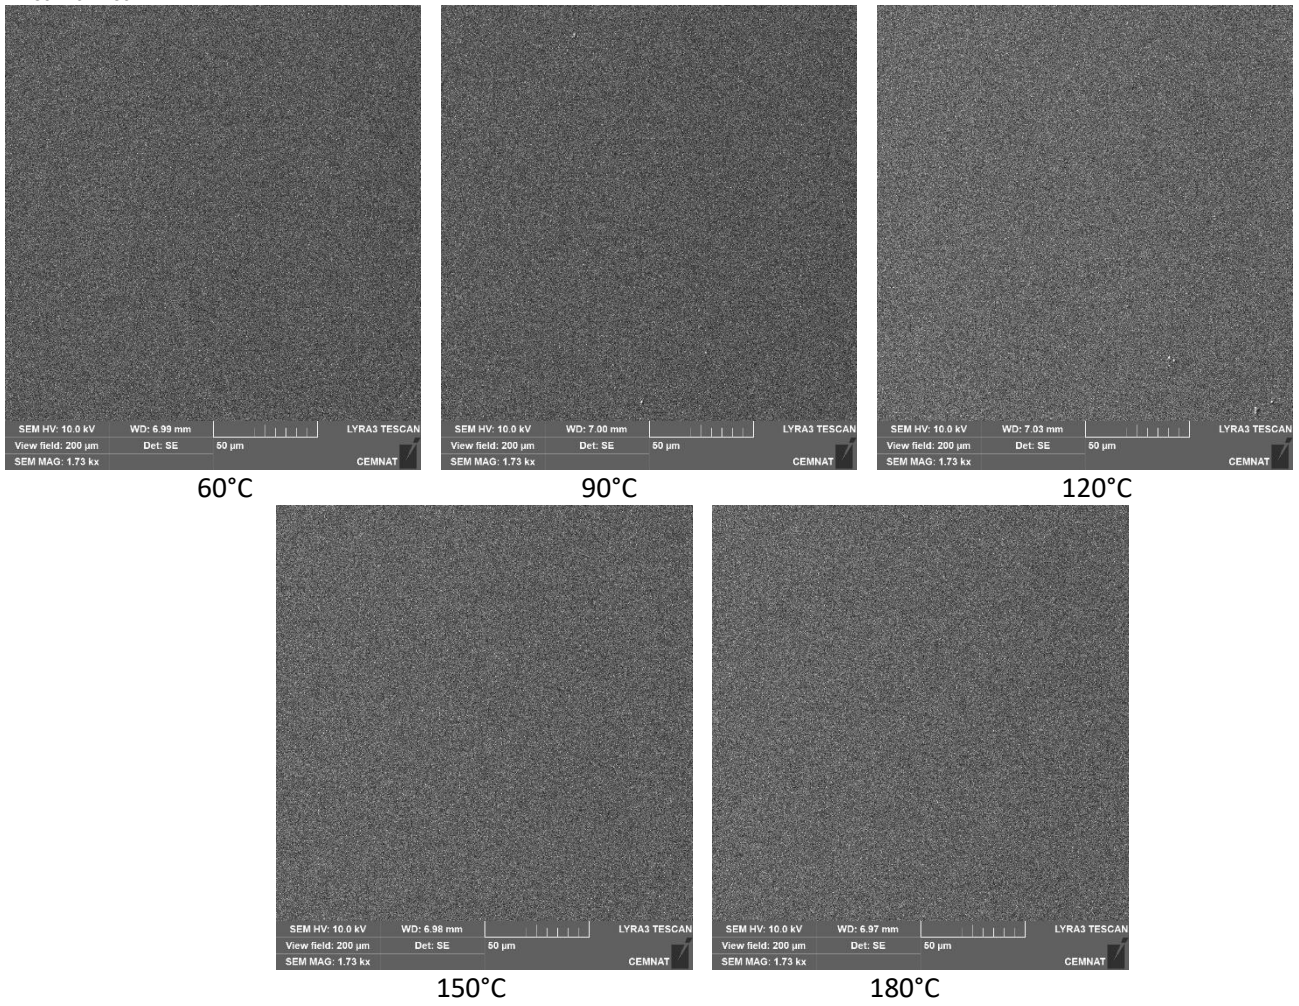

Figure 4S. AFM scans of all studied thin film compositions at all annealing temperatures – scan size 5 x 5 µm .

As<sub>30</sub>Se<sub>70</sub>

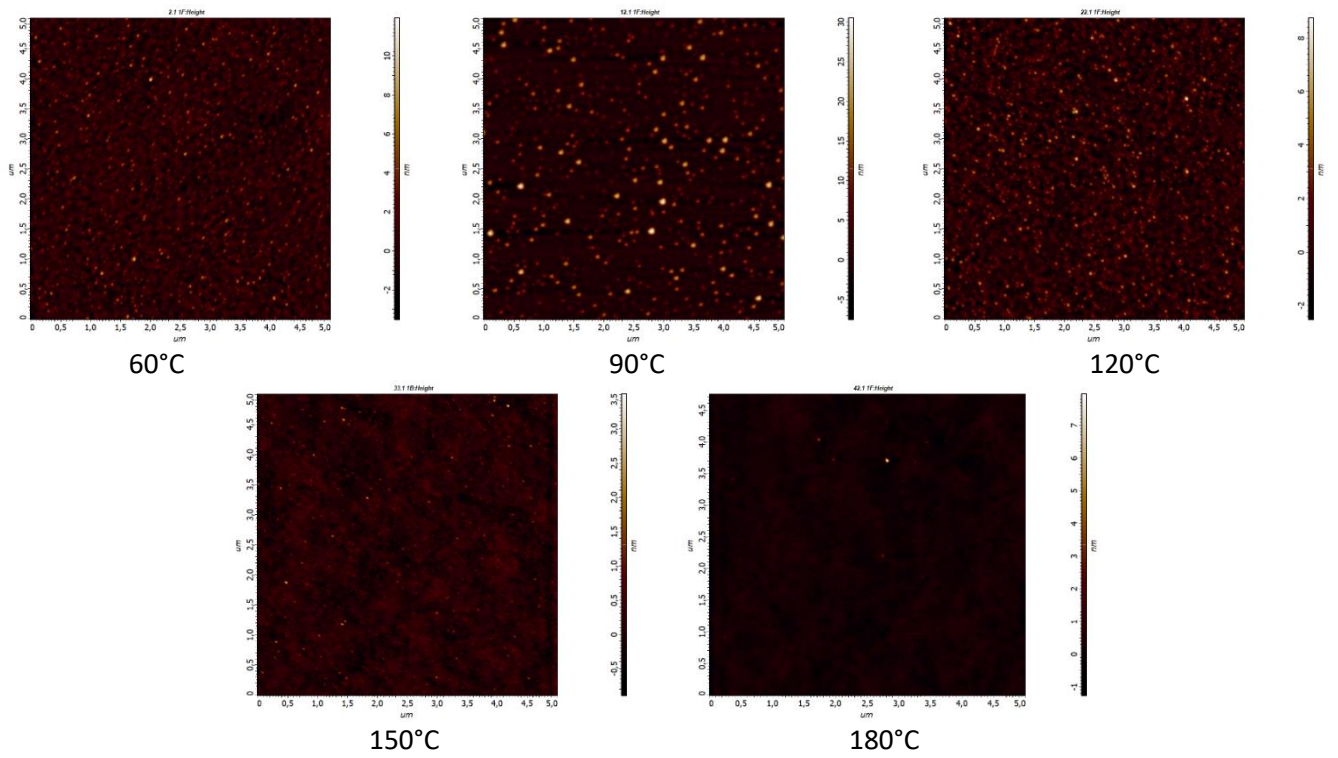



As<sub>35</sub>Se<sub>65</sub>

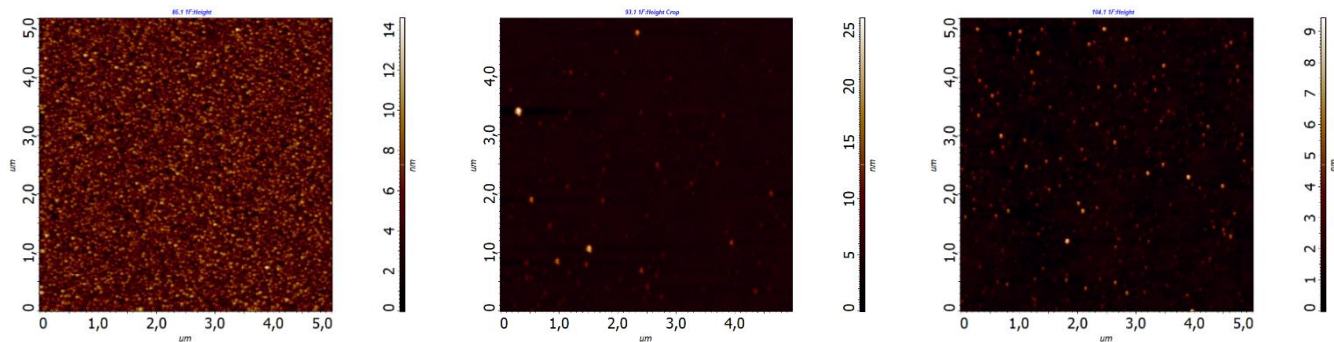

60°C

90°C

120°C

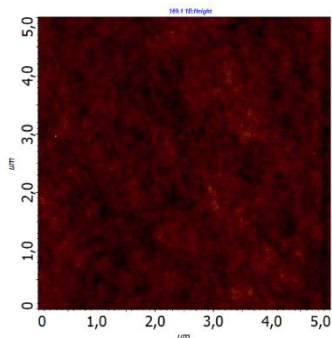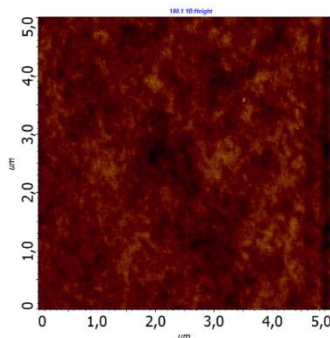

150°C

180°C

As<sub>40</sub>Se<sub>60</sub>

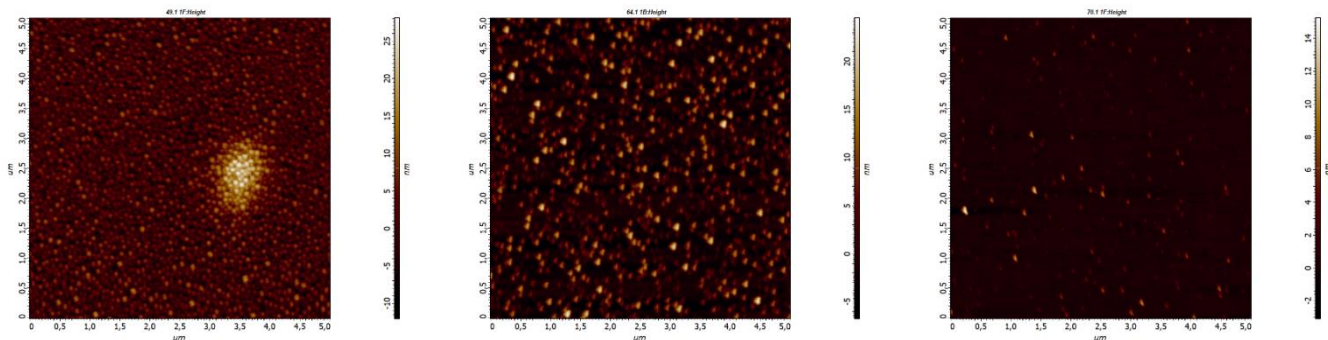

60°C

90°C

120°C

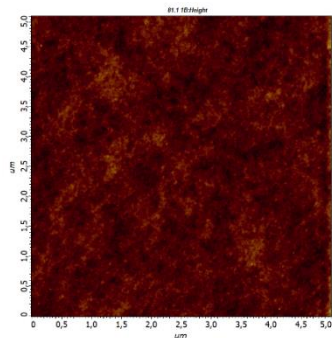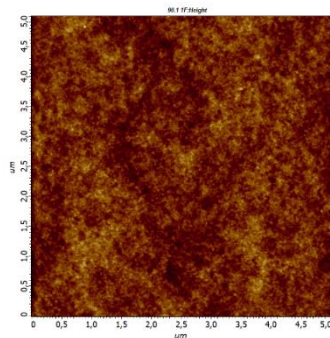

150°C

180°C

As<sub>45</sub>Se<sub>55</sub>

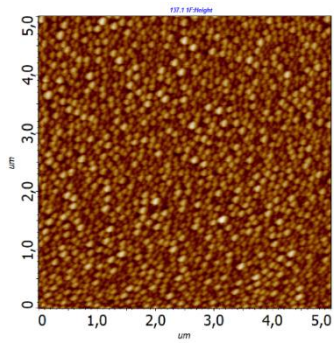

60°C

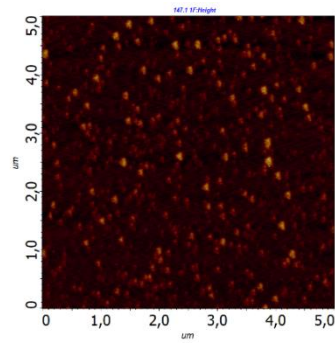

90°C

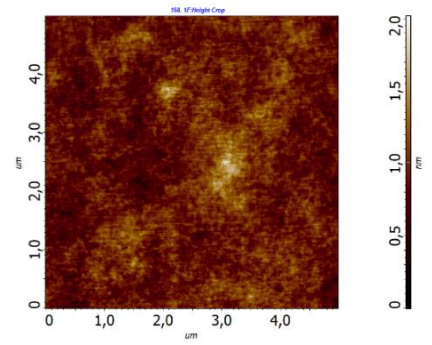

120°C

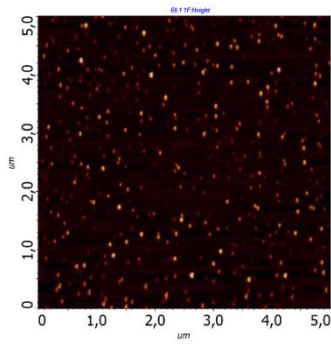

150°C

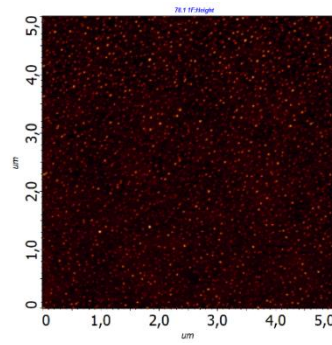

180°C

As<sub>50</sub>Se<sub>50</sub>

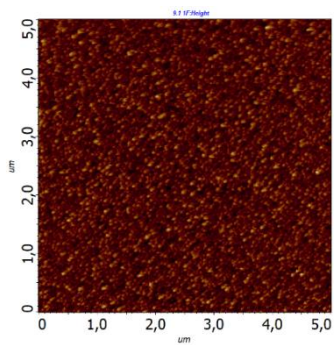

60°C

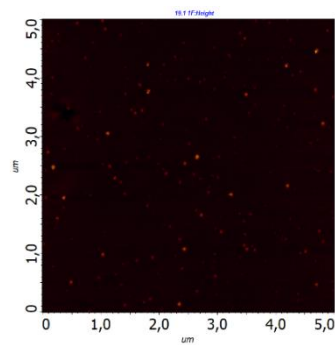

90°C

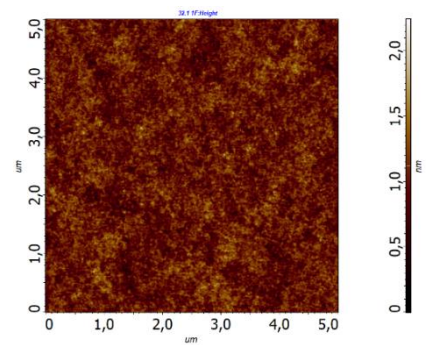

120°C

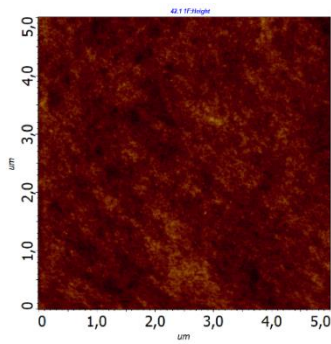

150°C

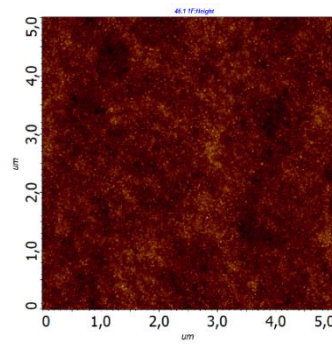

180°C



As<sub>45</sub>S<sub>10</sub>Se<sub>45</sub>

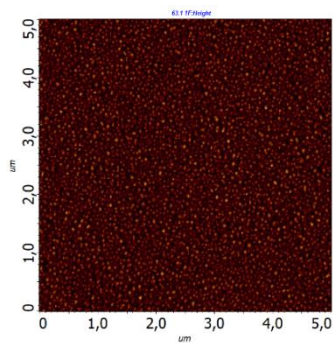

60°C

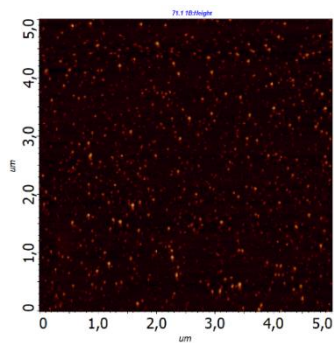

90°C

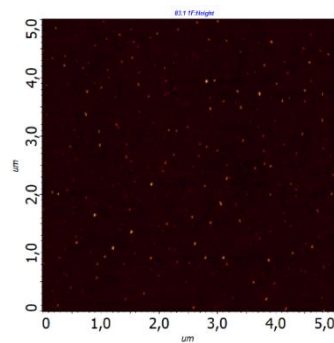

120°C

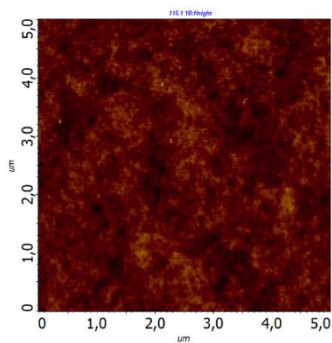

150°C

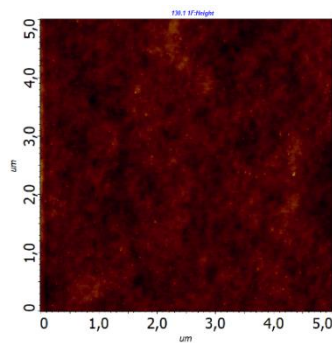

180°C

As<sub>40</sub>S<sub>20</sub>Se<sub>40</sub>

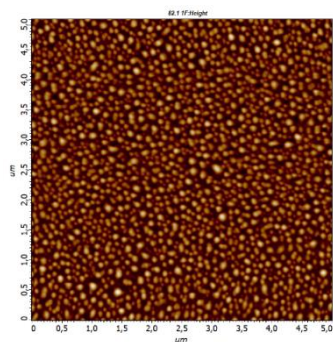

60°C

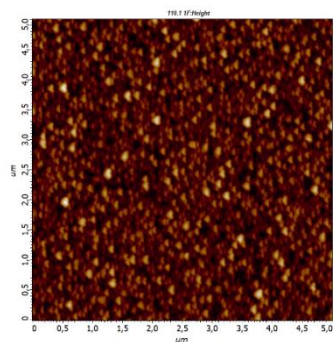

90°C

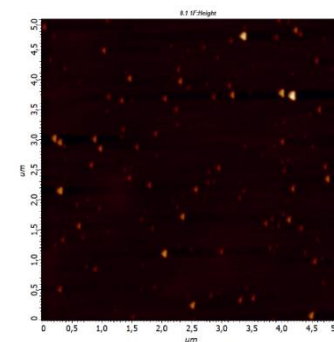

120°C

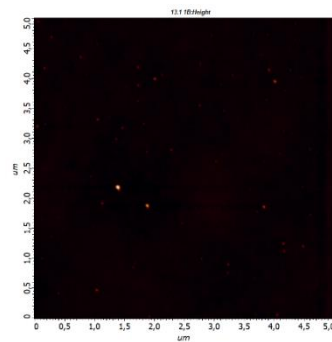

150°C

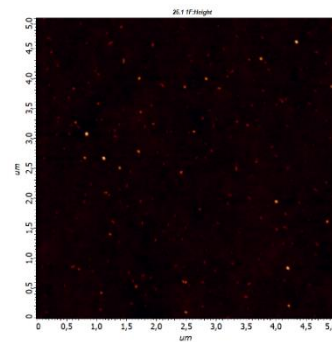

180°C



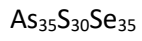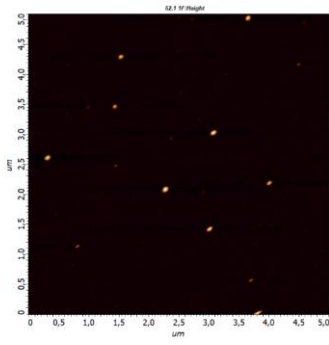

60°C

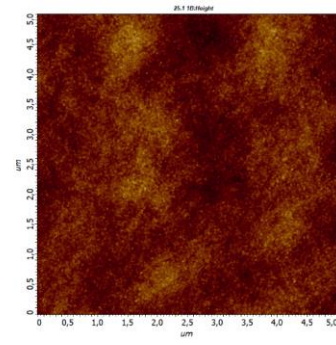

90°C

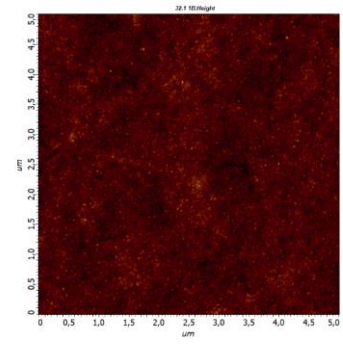

120°C

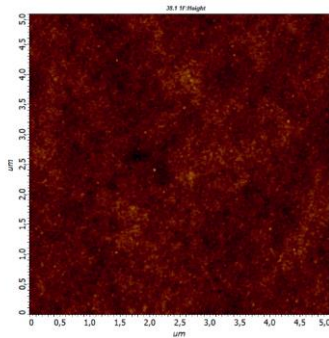

150°C

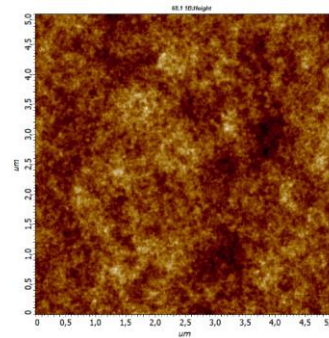

180°C

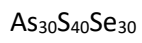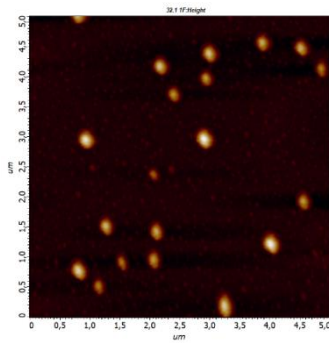

60°C

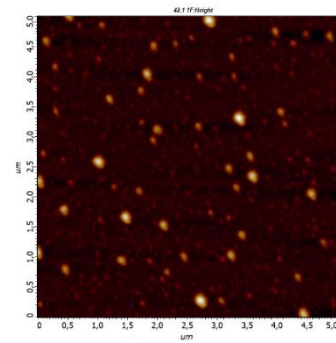

90°C

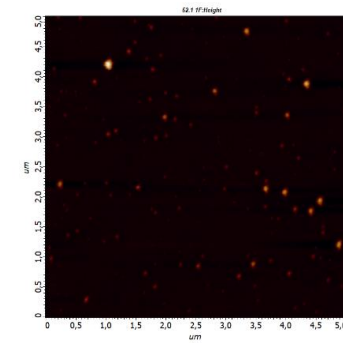

120°C

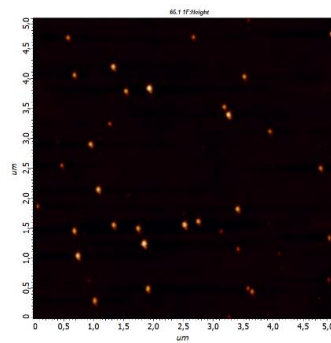

150°C

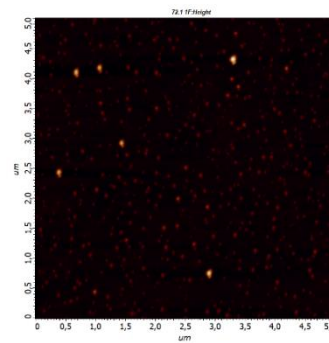

180°C

**Table 2S.** Values of thickness for all studied thin film compositions at all annealing temperatures.

| <b>d [nm]</b>                                       | <b>T = 60°C</b> | <b>T = 90°C</b> | <b>T = 120°C</b> | <b>T = 150°C</b> |
|-----------------------------------------------------|-----------------|-----------------|------------------|------------------|
| <b>As<sub>30</sub>Se<sub>70</sub></b>               | 295.0 ± 7.9     | 276.4 ± 5.2     | 268.9 ± 5.8      | 253.3 ± 5.4      |
| <b>As<sub>35</sub>Se<sub>65</sub></b>               | 319.8 ± 10.6    | 301.5 ± 6.0     | 291.8 ± 6.0      | 279.8 ± 5.9      |
| <b>As<sub>40</sub>Se<sub>60</sub></b>               | 343.2 ± 5.7     | 321.9 ± 5.9     | 312.2 ± 5.9      | 304.7 ± 5.2      |
| <b>As<sub>45</sub>Se<sub>55</sub></b>               | 325.0 ± 8.1     | 308.4 ± 6.2     | 298.5 ± 3.0      | 280.9 ± 4.9      |
| <b>As<sub>50</sub>Se<sub>50</sub></b>               | 317.6 ± 4.8     | 295.3 ± 9.7     | 279.0 ± 6.1      | 255.4 ± 4.9      |
| <b>As<sub>45</sub>S<sub>10</sub>Se<sub>45</sub></b> | 353.6 ± 15.7    | 328.6 ± 11.9    | 321.3 ± 6.9      | 302.8 ± 11.7     |
| <b>As<sub>40</sub>S<sub>20</sub>Se<sub>40</sub></b> | 420.1 ± 24.2    | 390.4 ± 18.4    | 370.7 ± 14.1     | 360.1 ± 15.5     |
| <b>As<sub>35</sub>S<sub>30</sub>Se<sub>35</sub></b> | 489.6 ± 17.7    | 459.6 ± 23.9    | 436.2 ± 27.3     | 408.6 ± 19.8     |
| <b>As<sub>30</sub>S<sub>40</sub>Se<sub>30</sub></b> | 539.3 ± 10.2    | 483.0 ± 4.1     | 455.8 ± 6.0      | 412.6 ± 8.3      |

**Table 3S.** Values of refractive index at 1550 nm for all studied thin film compositions at all annealing temperatures.

| <b>n<sub>1550 nm</sub></b>                          | <b>T = 60°C</b> | <b>T = 90°C</b> | <b>T = 120°C</b> | <b>T = 150°C</b> |
|-----------------------------------------------------|-----------------|-----------------|------------------|------------------|
| <b>As<sub>30</sub>Se<sub>70</sub></b>               | 2.47 ± 0.02     | 2.53 ± 0.01     | 2.56 ± 0.02      | 2.62 ± 0.02      |
| <b>As<sub>35</sub>Se<sub>65</sub></b>               | 2.51 ± 0.02     | 2.58 ± 0.04     | 2.61 ± 0.03      | 2.67 ± 0.04      |
| <b>As<sub>40</sub>Se<sub>60</sub></b>               | 2.52 ± 0.02     | 2.61 ± 0.01     | 2.64 ± 0.02      | 2.69 ± 0.02      |
| <b>As<sub>45</sub>Se<sub>55</sub></b>               | 2.54 ± 0.01     | 2.59 ± 0.03     | 2.63 ± 0.03      | 2.71 ± 0.02      |
| <b>As<sub>50</sub>Se<sub>50</sub></b>               | 2.51 ± 0.03     | 2.57 ± 0.03     | 2.63 ± 0.02      | 2.71 ± 0.02      |
| <b>As<sub>45</sub>S<sub>10</sub>Se<sub>45</sub></b> | 2.44 ± 0.02     | 2.50 ± 0.02     | 2.52 ± 0.02      | 2.59 ± 0.03      |
| <b>As<sub>40</sub>S<sub>20</sub>Se<sub>40</sub></b> | 2.41 ± 0.01     | 2.50 ± 0.01     | 2.54 ± 0.01      | 2.58 ± 0.01      |
| <b>As<sub>35</sub>S<sub>30</sub>Se<sub>35</sub></b> | 2.35 ± 0.02     | 2.40 ± 0.01     | 2.45 ± 0.01      | 2.51 ± 0.03      |
| <b>As<sub>30</sub>S<sub>40</sub>Se<sub>30</sub></b> | 2.23 ± 0.01     | 2.32 ± 0.01     | 2.37 ± 0.02      | 2.45 ± 0.02      |

**Table 4S.** Values of optical band gap for all studied thin film compositions at all annealing temperatures.

| <b>E<sub>g</sub><sup>opt</sup> [eV]</b>             | <b>T = 60°C</b> | <b>T = 90°C</b> | <b>T = 120°C</b> | <b>T = 150°C</b> |
|-----------------------------------------------------|-----------------|-----------------|------------------|------------------|
| <b>As<sub>30</sub>Se<sub>70</sub></b>               | 1.74 ± 0.01     | 1.74 ± 0.01     | 1.74 ± 0.01      | 1.73 ± 0.01      |
| <b>As<sub>35</sub>Se<sub>65</sub></b>               | 1.73 ± 0.01     | 1.70 ± 0.01     | 1.70 ± 0.01      | 1.68 ± 0.01      |
| <b>As<sub>40</sub>Se<sub>60</sub></b>               | 1.73 ± 0.01     | 1.70 ± 0.01     | 1.69 ± 0.01      | 1.67 ± 0.01      |
| <b>As<sub>45</sub>Se<sub>55</sub></b>               | 1.71 ± 0.01     | 1.69 ± 0.01     | 1.69 ± 0.01      | 1.68 ± 0.01      |
| <b>As<sub>50</sub>Se<sub>50</sub></b>               | 1.70 ± 0.01     | 1.69 ± 0.01     | 1.69 ± 0.01      | 1.69 ± 0.01      |
| <b>As<sub>45</sub>S<sub>10</sub>Se<sub>45</sub></b> | 1.83 ± 0.01     | 1.80 ± 0.01     | 1.78 ± 0.01      | 1.76 ± 0.01      |
| <b>As<sub>40</sub>S<sub>20</sub>Se<sub>40</sub></b> | 1.87 ± 0.01     | 1.84 ± 0.01     | 1.83 ± 0.01      | 1.82 ± 0.01      |
| <b>As<sub>35</sub>S<sub>30</sub>Se<sub>35</sub></b> | 1.96 ± 0.02     | 1.94 ± 0.01     | 1.93 ± 0.01      | 1.92 ± 0.01      |
| <b>As<sub>30</sub>S<sub>40</sub>Se<sub>30</sub></b> | 2.06 ± 0.01     | 2.04 ± 0.01     | 2.03 ± 0.01      | 2.04 ± 0.01      |
